# Supplementary material for: Study of serious adverse drug reactions using FDA-approved drug labeling and MedDRA
Source: BMC Bioinformatics. 2019 Mar 14;20(Suppl 2):97. doi: 10.1186/s12859-019-2628-5 (PMC6419320; doi:10.1186/s12859-019-2628-5)
Supplement: Supplementary file 1 — Table S1. The entire MedDRA PT corpus for Boxed Warning sections among selected 367 drugs; (XLS 62 kb) [file 12859_2019_2628_MOESM1_ESM.xls]

## Sheet: Sheet1
PT-Code	PT-Name	Counts
10011906	Death	124
10036556	Pregnancy	62
10012378	Depression	53
10055798	Haemorrhage	43
10028596	Myocardial infarction	34
10008190	Cerebrovascular accident	32
10061216	Infarction	31
10066169	Substance abuse	29
10012335	Dependence	27
10021789	Infection	27
10010071	Coma	26
10019851	Hepatotoxicity	26
10012267	Dementia	26
10028997	Neoplasm malignant	26
10061920	Psychotic disorder	25
10038678	Respiratory depression	24
10010144	Completed suicide	23
10039897	Sedation	22
10010356	Congenital anomaly	21
10007554	Cardiac failure	20
10029216	Nervousness	19
10033371	Pain	19
10019663	Hepatic failure	19
10076705	Perforation	17
10021097	Hypotension	17
10039906	Seizure	17
10065553	Bone marrow failure	16
10069339	Acute kidney injury	15
10017955	Gastrointestinal haemorrhage	15
10020772	Hypertension	14
10013968	Dyspnoea	14
10012601	Diabetes mellitus	14
10030095	Oedema	14
10042434	Sudden death	13
10045285	Ulcer	13
10034341	Peptic ulcer	13
10048010	Withdrawal syndrome	13
10019717	Hepatitis	13
10025310	Lymphoma	12
10043607	Thrombosis	12
10016642	Fibrosis	12
10033799	Paralysis	12
10029354	Neutropenia	12
10012735	Diarrhoea	12
10035664	Pneumonia	12
10013710	Drug interaction	11
10024670	Liver disorder	11
10002034	Anaemia	11
10038435	Renal failure	11
10062237	Renal impairment	11
10003119	Arrhythmia	11
10020751	Hypersensitivity	11
10067125	Liver injury	10
10037660	Pyrexia	10
10051055	Deep vein thrombosis	10
10028813	Nausea	10
10061169	Embolism	10
10061428	Decreased appetite	9
10013082	Discomfort	9
10037377	Pulmonary embolism	9
10003553	Asthma	9
10007515	Cardiac arrest	9
10043554	Thrombocytopenia	9
10047700	Vomiting	9
10055690	Foetal death	9
10043275	Teratogenicity	8
10003549	Asthenia	8
10042772	Syncope	8
10002091	Anaesthesia	8
10062016	Immunosuppression	8
10067467	Nephrogenic systemic fibrosis	8
10008479	Chest pain	8
10000486	Acidosis	7
10029155	Nephropathy toxic	7
10007559	Cardiac failure congestive	7
10037844	Rash	7
10002198	Anaphylactic reaction	7
10000804	Acute hepatic failure	7
10023676	Lactic acidosis	7
10006187	Breast cancer	7
10014733	Endometrial cancer	7
10019731	Hepatitis B	7
10039020	Rhabdomyolysis	7
10024264	Lethargy	7
10029202	Nervous system disorder	7
10058907	Spinal deformity	6
10028851	Necrosis	6
10020843	Hyperthermia	6
10019842	Hepatomegaly	6
10018852	Haematoma	6
10061619	Deformity	6
10044066	Torsade de pointes	6
10005169	Blindness	6
10043071	Tachycardia	6
10050162	Spinal epidural haematoma	5
10041243	Social avoidant behaviour	5
10002967	Aplastic anaemia	5
10015037	Epilepsy	5
10003658	Atrial fibrillation	5
10029883	Obesity	5
10006482	Bronchospasm	5
10011224	Cough	5
10042128	Stomatitis	5
10025482	Malaise	5
10033645	Pancreatitis	5
10048962	Brain oedema	5
10023126	Jaundice	5
10000081	Abdominal pain	5
10044223	Toxic epidermal necrolysis	5
10011078	Coronary artery disease	5
10003074	Arachnoiditis	5
10052804	Drug tolerance	5
10009887	Colitis	5
10033661	Pancytopenia	4
10061592	Cardiac fibrillation	4
10010305	Confusional state	4
10012174	Dehydration	4
10029350	Neurotoxicity	4
10001639	Alcoholism	4
10061178	Genital haemorrhage	4
10001488	Aggression	4
10008111	Cerebral haemorrhage	4
10024384	Leukopenia	4
10003445	Ascites	4
10014755	Endometrial hyperplasia	4
10024288	Leukaemia	4
10020718	Hyperplasia	4
10015866	Extravasation	4
10008909	Chronic hepatitis	4
10029331	Neuropathy peripheral	4
10013663	Drug dependence	4
10046910	Vaginal haemorrhage	4
10047302	Ventricular tachycardia	4
10039073	Rheumatoid arthritis	4
10061598	Immunodeficiency	4
10003246	Arthritis	4
10016256	Fatigue	4
10021027	Hypomagnesaemia	3
10042674	Swelling	3
10020937	Hypoaesthesia	3
10041349	Somnolence	3
10040560	Shock	3
10067989	Intellectual disability	3
10037153	Psoriasis	3
10043224	Tenderness	3
10031127	Orthostatic hypotension	3
10015150	Erythema	3
10047249	Venous thrombosis	3
10052895	Coronary artery insufficiency	3
10019063	Hallucination	3
10022998	Irritability	3
10020400	Hostility	3
10028970	Neonatal respiratory depression	3
10018985	Haemorrhage intracranial	3
10014522	Embolism venous	3
10027599	Migraine	3
10002383	Angina pectoris	3
10019211	Headache	3
10041524	Spina bifida	3
10052641	Mitochondrial DNA mutation	3
10020646	Hyperkalaemia	3
10035226	Plasma cell myeloma	3
10049119	Emotional distress	3
10020161	HIV infection	3
10008910	Chronic hepatitis B	3
10021015	Hypokalaemia	3
10035742	Pneumonitis	3
10037858	Rash generalised	3
10030124	Oedema peripheral	3
10073755	Pneumocystis jirovecii pneumonia	3
10038687	Respiratory distress	3
10026749	Mania	3
10042458	Suicidal ideation	3
10001597	Alcohol interaction	3
10022694	Intestinal perforation	3
10006458	Bronchitis chronic	2
10059516	Skin toxicity	2
10016825	Flushing	2
10028600	Myocardial ischaemia	2
10061736	Bronchitis bacterial	2
10020993	Hypoglycaemia	2
10061536	Parkinson's disease	2
10013654	Drug abuse	2
10067647	Delivery	2
10011781	Cystitis	2
10045170	Tumour lysis syndrome	2
10028372	Muscular weakness	2
10010774	Constipation	2
10040108	Serotonin syndrome	2
10012305	Demyelination	2
10001507	Agranulocytosis	2
10013573	Dizziness	2
10029898	Obsessive-compulsive disorder	2
10012431	Dermatitis	2
10020802	Hypertensive crisis	2
10034636	Peripheral vascular disorder	2
10000060	Abdominal distension	2
10018092	Generalised oedema	2
10033109	Ototoxicity	2
10038910	Retinitis	2
10016807	Fluid retention	2
10028347	Muscle twitching	2
10025082	Lung disorder	2
10028034	Mouth ulceration	2
10047281	Ventricular arrhythmia	2
10014866	Enteritis	2
10043882	Tinnitus	2
10019641	Hepatic cirrhosis	2
10040047	Sepsis	2
10003645	Atopy	2
10061218	Inflammation	2
10019837	Hepatocellular injury	2
10058467	Lung neoplasm malignant	2
10026865	Mass	2
10042033	Stevens-Johnson syndrome	2
10044755	Tuberculosis	2
10002388	Angina unstable	2
10048843	Cytomegalovirus chorioretinitis	2
10013916	Dyskinesia	2
10065769	Soft tissue necrosis	2
10014513	Embolism arterial	2
10013950	Dysphagia	2
10033557	Palpitations	2
10018687	Granulocytopenia	2
10059024	Gastrointestinal toxicity	2
10020947	Hypocalcaemia	2
10033775	Paraesthesia	2
10024803	Long QT syndrome	2
10016288	Febrile neutropenia	2
10028641	Myopathy	2
10011878	Deafness	2
10036590	Premature baby	2
10037087	Pruritus	2
10006093	Bradycardia	2
10019744	Hepatitis C	2
10063045	Effusion	2
10042971	T-cell lymphoma	2
10000210	Abortion	2
10035598	Pleural effusion	2
10012438	Dermatitis atopic	2
10028417	Myasthenia gravis	2
10006451	Bronchitis	2
10022611	Interstitial lung disease	2
10061924	Pulmonary toxicity	2
10014625	Encephalopathy	2
10031264	Osteonecrosis	2
10020850	Hyperthyroidism	2
10007610	Cardiac tamponade	2
10028334	Muscle spasms	2
10043255	Tendonitis	2
10007636	Cardiomyopathy	2
10019719	Hepatitis A	2
10044390	Transient ischaemic attack	2
10064919	Hypospermia	1
10001389	Adrenocortical insufficiency acute	1
10023891	Laryngospasm	1
10001141	Adenocarcinoma	1
10061256	Ischaemic stroke	1
10013971	Dyspnoea exertional	1
10018932	Haemolytic uraemic syndrome	1
10020844	Hyperthermia malignant	1
10022004	Influenza like illness	1
10071601	CYP2D6 polymorphism	1
10039491	Sarcoma	1
10043118	Tardive dyskinesia	1
10034576	Peripheral ischaemia	1
10043101	Talipes	1
10070668	Huntington's disease	1
10011498	Cryptorchism	1
10023003	Irritable bowel syndrome	1
10020508	Hydrocephalus	1
10073785	Autoimmune haemolytic anaemia	1
10061232	Lymphoproliferative disorder	1
10013952	Dysphonia	1
10027496	Methaemoglobinaemia	1
10020603	Hypercholesterolaemia	1
10028035	Movement disorder	1
10051592	Acute coronary syndrome	1
10067477	Cytogenetic abnormality	1
10028483	Mycosis fungoides	1
10003671	Atrioventricular block	1
10028245	Multiple sclerosis	1
10028934	Neonatal disorder	1
10061481	Renal injury	1
10001584	Alcohol abuse	1
10062575	Muscle contracture	1
10049680	Quadriparesis	1
10009866	Cold sweat	1
10045181	Turner's syndrome	1
10034229	Peliosis hepatis	1
10031290	Osteoporotic fracture	1
10061450	Carcinoma in situ	1
10038669	Respiratory arrest	1
10015218	Erythema multiforme	1
10009802	Coagulopathy	1
10012239	Delusion	1
10020642	Hyperhidrosis	1
10061255	Ischaemia	1
10019016	Haemorrhagic stroke	1
10014720	Endometrial adenocarcinoma	1
10061334	Partial seizures	1
10040844	Skin exfoliation	1
10046571	Urinary tract infection	1
10028533	Myelodysplastic syndrome	1
10002068	Anaemia neonatal	1
10027534	Microcephaly	1
10028335	Muscle spasticity	1
10009269	Cleft palate	1
10008604	Cholangitis	1
10024769	Local reaction	1
10072268	Drug-induced liver injury	1
10019974	Herpes zoster	1
10038743	Restlessness	1
10073094	Intraductal proliferative breast lesion	1
10021750	Infantile spasms	1
10042682	Swelling face	1
10047163	Vasospasm	1
10027548	Microphthalmos	1
10019636	Hepatic artery thrombosis	1
10011490	Cryptococcosis	1
10000125	Abnormal dreams	1
10037549	Purpura	1
10037912	Raynaud's phenomenon	1
10062060	Hyperlipidaemia	1
10028403	Mutism	1
10021143	Hypoxia	1
10028810	Nasopharyngitis	1
10019708	Hepatic steatosis	1
10021036	Hyponatraemia	1
10003988	Back pain	1
10051358	Post transplant lymphoproliferative disorder	1
10008120	Cerebral ischaemia	1
10024378	Leukocytosis	1
10009895	Colitis ischaemic	1
10000830	Acute leukaemia	1
10047555	Visual field defect	1
10053648	Vascular occlusion	1
10024855	Loss of consciousness	1
10076051	Spinal cord haematoma	1
10018867	Haematuria	1
10014950	Eosinophilia	1
10021113	Hypothermia	1
10000410	Acetonaemia	1
10021926	Infertility	1
10073734	Microembolism	1
10061273	Malnutrition	1
10001019	Acute promyelocytic leukaemia	1
10028356	Muscular dystrophy	1
10021972	Inflammatory bowel disease	1
10001928	Amenorrhoea	1
10002974	Apnoea	1
10031151	Osteitis deformans	1
10014928	Enuresis	1
10042132	Stomatitis haemorrhagic	1
10013781	Dry mouth	1
10020583	Hypercalcaemia	1
10028606	Myocarditis	1
10008912	Chronic hepatitis C	1
10038923	Retinopathy	1
10054107	Nodule	1
10057668	Cognitive disorder	1
10051747	Multiple endocrine neoplasia	1
10002961	Aplasia	1
10040753	Sinusitis	1
10076331	Steatohepatitis	1
10042778	Syndactyly	1
10001497	Agitation	1
10040070	Septic shock	1
10034800	Phaeochromocytoma	1
10072953	Term birth	1
10048908	Seasonal allergy	1
10045555	Unresponsive to stimuli	1
10040808	Skin cancer	1
10013983	Dystonia	1
10033664	Panic attack	1
10061332	Paraganglion neoplasm	1
10049666	Homicidal ideation	1
10002654	Anotia	1
10074268	Reproductive toxicity	1
10060734	Diabetic foot	1
10035132	Placental disorder	1
10013887	Dysarthria	1
10003885	Azotaemia	1
10000880	Acute myeloid leukaemia	1
10072851	Post-injection delirium sedation syndrome	1
10062599	Arterial occlusive disease	1
10021198	Ichthyosis	1
10003210	Arteriosclerosis	1
10003662	Atrial flutter	1
10061249	Intra-abdominal haemorrhage	1
10010145	Complex partial seizures	1
10028713	Narcolepsy	1
10057667	Bipolar disorder	1
10043648	Thrombotic thrombocytopenic purpura	1
10027417	Metabolic acidosis	1
10009033	Chronic obstructive pulmonary disease	1
10047290	Ventricular fibrillation	1
10018304	Glaucoma	1
10002855	Anxiety	1
10011703	Cyanosis	1
10061596	Gastrointestinal malformation	1
10047486	Virilism	1
10012373	Depressed level of consciousness	1
10027287	Meningomyelocele	1
10000565	Acquired immunodeficiency syndrome	1
10065048	Latent tuberculosis	1
10025270	Lymphocytic leukaemia	1
10066474	Thyroid cancer	1
10064805	Tachyphrenia	1
10042062	Stillbirth	1
10003736	Attention deficit/hyperactivity disorder	1
10066901	Treatment failure	1
10013700	Drug hypersensitivity	1
10066957	Hepatosplenic T-cell lymphoma	1
10004661	Biliary cirrhosis primary	1
10021328	Ileus	1
10031291	Osteosarcoma	1
10027313	Menorrhagia	1
10037032	Proteinuria	1
10020910	Hyperventilation	1
10068319	Oropharyngeal pain	1
10047513	Vision blurred	1
10037211	Psychomotor hyperactivity	1
10024929	Low set ears	1
10008531	Chills	1
10016334	Feeling hot	1
10018964	Haemoptysis	1
10024500	Limb malformation	1
10060933	Adverse event	1
10045178	Tunnel vision	1
10012218	Delirium	1
10016717	Fistula	1
10028330	Muscle rigidity	1
10065687	Bone loss	1
10008088	Cerebral artery embolism	1
10002368	Anger	1
10023388	Ketonuria	1
10022000	Influenza	1
10027457	Metastases to liver	1
10041092	Small for dates baby	1
10000234	Abortion spontaneous	1
10037383	Pulmonary fibrosis	1
10033546	Pallor	1
10008958	Chronic lymphocytic leukaemia	1
10044565	Tremor	1
10021118	Hypotonia	1
10018916	Haemolytic anaemia	1
10021030	Hypomania	1
10074835	Parkinson's disease psychosis	1
10074832	Benign ethnic neutropenia	1
10004939	Bipolar I disorder	1
10047097	Vascular purpura	1
10052076	Haemodynamic instability	1
10048610	Cardiotoxicity	1
10000097	Abdominal tenderness	1
10076711	Stenosis	1
10008748	Chorea	1
10018910	Haemolysis	1
10043561	Thrombocytopenic purpura	1
10011793	Cystitis haemorrhagic	1
