# Supplementary material for: Study of serious adverse drug reactions using FDA-approved drug labeling and MedDRA
Source: BMC Bioinformatics. 2019 Mar 14;20(Suppl 2):97. doi: 10.1186/s12859-019-2628-5 (PMC6419320; doi:10.1186/s12859-019-2628-5)
Supplement: Supplementary file 4 — Table S4. MedDRA term extraction performance of Oracle Text Search (XLS 56 kb) [file 12859_2019_2628_MOESM4_ESM.xls]

## Sheet: Sheet1
PROPRIETARY NAME	set_id	TP	FP	FN	Recall	Precision	Known PT	Found PT	False Negative PT(s)	FN Description
ADCETRIS	3904f8dd-1aef-3490-e48f-bd55f32ed67f	3	2	0	1	0.6	progressive multifocal leukoencephalopathy; jc virus infection; death	death; infection; progressive multifocal leukoencephalopathy; jc virus infection; leukoencephalopathy
ARCAPTA NEOHALER	f7d013b1-5ee9-4126-8297-9efd9a5a8344	1	1	0	1	0.5	death	death; asthma
BLINCYTO	38b482a8-960b-4591-9857-5031ecb830aa	1	0	0	1	1	cytokine release syndrome	cytokine release syndrome
COMETRIQ	1a0c3bea-c87b-4d25-bb44-5f0174da6b34	3	2	0	1	0.6	haemorrhage; haemoptysis; gastrointestinal haemorrhage	gastrointestinal haemorrhage; haemorrhage; haemoptysis; fistula; perforation
DOTAREM	82b83e61-6af8-4225-aa39-8cbf206f65b0	2	6	0	1	0.25	nephrogenic systemic fibrosis; fibrosis	injury; hypertension; nuclear magnetic resonance imaging; fibrosis; diabetes mellitus; nephrogenic systemic fibrosis; glomerular filtration rate; acute kidney injury
DUAVEE	e16705d8-4472-4f83-96ac-69fa2be066cb	5	10	0	1	0.333333	endometrial cancer; dementia; endometrial hyperplasia; cerebrovascular accident; deep vein thrombosis	vaginal haemorrhage; cerebrovascular accident; dementia; thrombosis; haemorrhage; deep vein thrombosis; blood oestrogen; neoplasm malignant; menopause; hyperplasia; endometrial cancer; endometrial hyperplasia; oestrogen therapy; genital haemorrhage; prophylaxis
DYSPORT	97513722-8426-4ce3-b85d-0e08e436a140	10	3	0	1	0.769231	asthenia; muscular weakness; diplopia; vision blurred; eyelid ptosis; dysphagia; dysphonia; dysarthria; urinary incontinence; death	dysarthria; diplopia; death; vision blurred; dysphagia; asthenia; muscle spasticity; incontinence; muscular weakness; eyelid ptosis; injection; urinary incontinence; dysphonia
ENTEREG	77a67dc6-35d3-48ff-9d18-292d4d442f70	1	1	0	1	0.5	myocardial infarction	infarction; myocardial infarction
EOVIST INJECTION	6218b1e1-cbc3-4c14-bec7-528ac163a561	2	6	0	1	0.25	nephrogenic systemic fibrosis; fibrosis	hypertension; injury; nuclear magnetic resonance imaging; fibrosis; nephrogenic systemic fibrosis; diabetes mellitus; glomerular filtration rate; acute kidney injury
FERRIPROX	dc8cbc3d-026c-0db5-42e8-8e93d374dd23	3	2	0	1	0.6	agranulocytosis; neutropenia; death	agranulocytosis; neutrophil count; death; neutropenia; infection
GADAVIST	3c5101a0-0c7e-4078-8dc3-a57beb9a0e92	2	6	0	1	0.25	nephrogenic systemic fibrosis; fibrosis	glomerular filtration rate; acute kidney injury; nuclear magnetic resonance imaging; injury; hypertension; nephrogenic systemic fibrosis; diabetes mellitus; fibrosis
JEVTANA	de3d9c26-572b-4ea4-9b2d-dd58a2b3e8fa	6	4	0	1	0.6	neutropenia; hypersensitivity; rash generalised; erythema; hypotension; bronchospasm	premedication; hypotension; bronchospasm; rash; erythema; infusion; hypersensitivity; neutropenia; prophylaxis; rash generalised
KALBITOR	f56aec67-c662-477c-b866-bfc23e8809cf	1	3	0	1	0.25	anaphylactic reaction	anaphylactic reaction; hereditary angioedema; angioedema; hypersensitivity
LUMIZYME	d6bfbc45-2d34-439e-8aad-59ee2d53d4df	19	3	0	1	0.863636	anaphylactic reaction; hypersensitivity; respiratory distress; hypoxia; apnoea; dyspnoea; bradycardia; tachycardia; bronchospasm; throat tightness; hypotension; angioedema; lip swelling; periorbital oedema; face oedema; urticaria; proteinuria; nephrotic syndrome; fluid overload	hypoxia; hypersensitivity; bronchospasm; respiratory distress; proteinuria; nephrotic syndrome; dyspnoea; apnoea; throat tightness; tachycardia; angioedema; lip swelling; swelling; anaphylactic reaction; hypotension; oedema; fluid overload; face oedema; periorbital oedema; bradycardia; emotional distress; urticaria
MULTAQ	3bd4006a-8bad-4909-ac6d-b6d84390155c	3	4	0	1	0.428571	death; cerebrovascular accident; cardiac failure	cerebrovascular accident; cardiac fibrillation; hospitalisation; atrial fibrillation; sinus rhythm; cardiac failure; death
NORTHERA	2179f02c-48d7-48eb-8007-5ae43d8d16bc	1	3	0	1	0.25	supine hypertension	supine hypertension; hypertension; discomfort; blood pressure measurement
POTIGA	0c60979b-489d-4e7b-8893-468ae00c44bb	1	1	0	1	0.5	blindness	blindness; optical coherence tomography
PROMACTA	616224ff-a925-4b38-9ca2-00fbf669380f	1	4	0	1	0.2	hepatic failure	chronic hepatitis; hepatic failure; chronic hepatitis c; hepatitis c; hepatitis
SAPHRIS	5429f134-839f-4ffc-9944-55f51238def8	1	3	0	1	0.25	death	elderly; death; dementia; psychotic disorder
SIMPONI ARIA	9e260a47-55af-4c92-8d88-a86ccc767fff	10	6	0	1	0.625	death; tuberculosis; bacterial sepsis; histoplasmosis; lymphoma; coccidioidomycosis; candida infection; aspergillus infection; blastomycosis; pneumocystis jirovecii pneumonia	blastomycosis; coccidioidomycosis; death; lymphoma; amyloid related imaging abnormalities; sepsis; infection; bacterial sepsis; hospitalisation; aspergillus infection; ill-defined disorder; tuberculosis; candida infection; pneumocystis jirovecii pneumonia; histoplasmosis; latent tuberculosis
SIRTURO	1534c9ae-4948-4cf4-9f66-222a99db6d0e	1	3	0	1	0.25	death	electrocardiogram qt interval; death; ventricular arrhythmia; arrhythmia
VIMIZIM	0caa2565-12b2-0ad0-1f9a-273e81c3d4cc	15	4	0	1	0.789474	anaphylactic reaction; cough; erythema; throat tightness; urticaria; flushing; cyanosis; hypotension; rash; dyspnoea; chest discomfort; nausea; abdominal pain; retching; vomiting	hypotension; discomfort; anaphylactic reaction; erythema; chest discomfort; urticaria; ill-defined disorder; abdominal pain; cyanosis; nausea; pain; dyspnoea; flushing; hypersensitivity; vomiting; rash; retching; throat tightness; cough
XEOMIN	3f35d6e0-3450-4abc-a0da-cc7b277e7c6e	10	5	0	1	0.666667	asthenia; muscular weakness; diplopia; vision blurred; eyelid ptosis; dysphagia; dysphonia; dysarthria; urinary incontinence; death	dystonia; death; asthenia; vision blurred; dysphagia; diplopia; dysarthria; injection; eyelid ptosis; muscular weakness; dysphonia; urinary incontinence; incontinence; torticollis; muscle spasticity
XIAFLEX	805cecd0-fd1f-11dd-87af-0800200c9a66	1	7	0	1	0.125	penile haematoma	haematoma; penile haematoma; ecchymosis; injury; fracture; surgery; adverse reaction; peyronie's disease
YERVOY	2265ef30-253e-11df-8a39-0800200c9a66	5	2	0	1	0.714286	enterocolitis; hepatitis; dermatitis; toxic epidermal necrolysis; neuropathy peripheral	neuropathy peripheral; toxic epidermal necrolysis; hepatitis; liver function test; enterocolitis; dermatitis; blood corticotrophin
ZYDELIG	efbdafa9-d18c-4e85-b4a2-1e620fc74e50	5	2	0	1	0.714286	diarrhoea; colitis; pneumonitis; intestinal perforation; hepatotoxicity	pneumonitis; hepatotoxicity; infection; perforation; diarrhoea; intestinal perforation; colitis
CIMZIA	b4c2c9dc-a0bb-4d64-a667-a67ebe88392d	10	5	1	0.909091	0.666667	death; tuberculosis; histoplasmosis; coccidioidomycosis; candida infection; aspergillus infection; blastomycosis; pneumocystis jirovecii pneumonia; histoplasmosis disseminated; lymphoma; bacterial sepsis	sepsis; pneumocystis jirovecii pneumonia; histoplasmosis; infection; latent tuberculosis; hospitalisation; bacterial sepsis; aspergillus infection; death; blastomycosis; coccidioidomycosis; lymphoma; ill-defined disorder; candida infection; tuberculosis	histoplasmosis disseminated	"histoplasmosis or other invasive fungal infections may present with disseminated"-human interpretation
ELIQUIS	e9481622-7cc6-418a-acb6-c5450daae9b0	1	10	1	0.5	0.0909091	spinal cord haematoma; extradural haematoma	extradural haematoma; spinal deformity; nervous system disorder; spinal epidural haematoma; haemorrhage; haematoma; haemostasis; anaesthesia; surgery; paralysis; deformity	spinal cord haematoma	"SPINAL/EPIDURAL HEMATOMA"-human interpretation of spinal cord haematoma
PRADAXA	ba74e3cd-b06f-4145-b284-5fd6b84ff3c9	1	10	1	0.5	0.0909091	spinal cord haematoma; extradural haematoma	spinal epidural haematoma; haemorrhage; haematoma; nervous system disorder; spinal deformity; extradural haematoma; deformity; surgery; paralysis; anaesthesia; haemostasis	spinal cord haematoma	"SPINAL/EPIDURAL HEMATOMA"-human interpretation of spinal cord haematoma
PRISTIQ	a9ff32c4-3bcf-4e51-ae8c-81ff0191ec35	0	1	1	0	0	suicidal behaviour	antidepressant therapy	suicidal behaviour	"suicidal thinking and behavior"-human interpretation
Average					0.930303	0.457599
