# Supplementary material for: Study of serious adverse drug reactions using FDA-approved drug labeling and MedDRA
Source: BMC Bioinformatics. 2019 Mar 14;20(Suppl 2):97. doi: 10.1186/s12859-019-2628-5 (PMC6419320; doi:10.1186/s12859-019-2628-5)
Supplement: Supplementary file 6 — Table S6. Overview of ATC second-level involved drugs (XLS 42 kb) [file 12859_2019_2628_MOESM6_ESM.xls]

## Sheet: Sheet1
ATC_class	Name	Involved Drugs
A02	DRUGS FOR ACID RELATED DISORDERS	3
A03	DRUGS FOR FUNCTIONAL GASTROINTESTINAL DISORDERS	2
A06	DRUGS FOR CONSTIPATION	2
A07	ANTIDIARRHEALS, INTESTINAL ANTIINFLAMMATORY/ANTIINFECTIVE AGENTS	1
A08	ANTIOBESITY PREPARATIONS, EXCL. DIET PRODUCTS	2
A10	DRUGS USED IN DIABETES	6
A14	ANABOLIC AGENTS FOR SYSTEMIC USE	1
A16	OTHER ALIMENTARY TRACT AND METABOLISM PRODUCTS	1
B01	ANTITHROMBOTIC AGENTS	10
B02	ANTIHEMORRHAGICS	1
C01	CARDIAC THERAPY	10
C02	ANTIHYPERTENSIVES	5
C03	DIURETICS	3
C05	VASOPROTECTIVES	1
C07	BETA BLOCKING AGENTS	5
C09	AGENTS ACTING ON THE RENIN-ANGIOTENSIN SYSTEM	10
C10	LIPID MODIFYING AGENTS	4
D01	ANTIFUNGALS FOR DERMATOLOGICAL USE	1
D05	ANTIPSORIATICS	2
D10	ANTI-ACNE PREPARATIONS	3
D11	OTHER DERMATOLOGICAL PREPARATIONS	7
G01	GYNECOLOGICAL ANTIINFECTIVES AND ANTISEPTICS	2
G02	OTHER GYNECOLOGICALS	11
G03	SEX HORMONES AND MODULATORS OF THE GENITAL SYSTEM	9
G04	UROLOGICALS	1
H01	PITUITARY AND HYPOTHALAMIC HORMONES AND ANALOGUES	1
H03	THYROID THERAPY	5
H05	CALCIUM HOMEOSTASIS	1
J01	ANTIBACTERIALS FOR SYSTEMIC USE	11
J02	ANTIMYCOTICS FOR SYSTEMIC USE	2
J04	ANTIMYCOBACTERIALS	3
J05	ANTIVIRALS FOR SYSTEMIC USE	21
L01	ANTINEOPLASTIC AGENTS	50
L02	ENDOCRINE THERAPY	4
L04	IMMUNOSUPPRESSANTS	15
M01	ANTIINFLAMMATORY AND ANTIRHEUMATIC PRODUCTS	17
M02	TOPICAL PRODUCTS FOR JOINT AND MUSCULAR PAIN	9
M03	MUSCLE RELAXANTS	3
M04	ANTIGOUT PREPARATIONS	1
M09	OTHER DRUGS FOR DISORDERS OF THE MUSCULO-SKELETAL SYSTEM	1
N01	ANESTHETICS	7
N02	ANALGESICS	18
N03	ANTIEPILEPTICS	11
N04	ANTI-PARKINSON DRUGS	2
N05	PSYCHOLEPTICS	27
N06	PSYCHOANALEPTICS	33
N07	OTHER NERVOUS SYSTEM DRUGS	6
P01	ANTIPROTOZOALS	2
R02	NASAL PREPARATIONS	1
R03	DRUGS FOR OBSTRUCTIVE AIRWAY DISEASES	5
R05	COUGH AND COLD PREPARATIONS	2
S01	OPHTHALMOLOGICALS	15
V03	ALL OTHER THERAPEUTIC PRODUCTS	3
V08	CONTRAST MEDIA	7
