# Supplementary material for: Study of serious adverse drug reactions using FDA-approved drug labeling and MedDRA
Source: BMC Bioinformatics. 2019 Mar 14;20(Suppl 2):97. doi: 10.1186/s12859-019-2628-5 (PMC6419320; doi:10.1186/s12859-019-2628-5)
Supplement: Supplementary file 7 — Table S7. Detailed PT distributions among drug ATC categories (XLS 66 kb) [file 12859_2019_2628_MOESM7_ESM.xls]

## Sheet: Suppl Table 4
		L01	N06	N05	J05	N02	M01	L04	S01	N03	G02	J01	C01	C09	B01	M02	G03	D11	N01	V08	N07	A10	C02	C07	H03	R03
		L	N	N	J	N	M	L	S	N	G	J	C	C	B	M	G	D	N	V	N	A	C	C	H	R
Anaemia	Blood	3	0	0	4	0	0	2	3	2	0	0	0	0	0	0	0	0	0	0	0	0	0	0	0	0
Bone marrow failure	Blood	11	0	0	0	0	0	0	0	2	0	0	0	0	0	0	0	0	0	0	0	0	0	0	0	0
Neutropenia	Blood	5	0	1	3	0	0	1	1	0	0	0	0	0	0	0	0	0	0	0	0	0	0	0	0	0
Thrombocytopenia	Blood	4	0	0	3	0	0	1	3	0	0	0	0	0	0	0	0	0	0	0	0	0	0	0	0	0
Aplastic anaemia	Blood	2	0	0	1	0	0	2	1	2	0	0	0	0	0	0	0	0	0	0	0	0	0	0	0	0
Pancytopenia	Blood	0	0	0	2	0	0	0	2	1	0	0	0	0	0	0	0	0	0	0	0	0	0	0	0	0
Leukopenia	Blood	2	0	0	1	0	1	0	1	0	0	0	0	0	0	0	0	0	0	0	0	0	0	0	0	0
Myocardial infarction	Card	2	2	0	0	0	15	2	7	0	6	0	5	0	1	9	3	4	0	0	0	0	0	4	0	0
Cardiac failure	Card	5	0	9	0	0	0	0	0	0	0	0	1	0	1	0	0	0	0	0	0	3	0	0	0	0
Arrhythmia	Card	1	0	0	0	1	0	0	0	0	0	0	5	0	0	0	0	0	0	0	1	0	0	1	0	0
Cardiac failure congestive	Card	4	0	0	0	0	0	0	0	0	0	0	0	0	0	0	0	0	0	0	0	3	0	0	0	0
Torsade de pointes	Card	2	0	0	0	1	0	0	0	0	0	0	1	0	0	0	0	0	0	0	1	0	0	0	0	0
Cardiac arrest	Card	0	0	1	0	0	0	0	0	0	0	0	3	0	0	0	0	0	0	1	0	0	0	0	0	0
Tachycardia	Card	1	0	1	0	0	0	0	0	0	0	0	2	0	0	0	0	0	0	0	0	0	0	1	0	0
Coronary artery disease	Card	0	0	0	0	0	0	0	0	0	0	0	0	0	0	0	1	0	0	0	0	0	0	4	0	0
Congenital anomaly	Cong	4	0	0	2	0	1	7	2	3	1	0	0	0	0	0	0	0	0	0	0	0	2	0	0	0
Congenital aortic valve stenosis	Cong	2	0	0	0	0	0	4	0	3	0	0	0	0	0	0	0	0	0	0	0	0	0	0	0	0
Teratogenicity	Cong	3	0	0	1	0	0	2	1	0	0	0	0	0	0	0	0	0	0	0	0	0	0	0	0	0
Deafness	Ear	1	2	0	0	0	0	0	1	0	0	1	0	0	0	0	0	0	0	0	0	0	0	0	0	0
Blindness	Eye	1	0	0	0	0	0	0	0	2	0	0	3	0	0	0	0	0	0	0	0	0	0	0	0	0
Gastrointestinal haemorrhage	Gastr	2	0	0	0	0	15	0	7	0	3	0	2	0	0	9	0	4	0	0	0	0	0	0	0	0
Peptic ulcer	Gastr	1	0	0	0	0	15	0	7	0	3	0	2	0	0	9	0	4	0	0	0	0	0	0	0	0
Diarrhoea	Gastr	5	0	0	0	0	1	2	0	0	0	3	0	0	0	0	0	0	0	0	0	0	0	0	0	0
Nausea	Gastr	3	0	0	0	0	0	0	0	3	0	0	0	0	0	0	0	0	0	0	0	0	1	0	0	0
Colitis	Gastr	1	0	0	0	0	0	0	0	0	0	3	0	0	0	0	0	0	0	0	0	0	0	0	0	0
Vomiting	Gastr	3	0	0	0	0	0	0	0	3	0	0	0	0	0	0	0	0	0	0	0	0	1	0	0	0
Stomatitis	Gastr	4	0	0	0	0	1	2	0	0	0	0	0	0	0	0	0	0	0	0	0	0	0	0	0	0
Ascites	Gastr	4	0	0	0	0	0	2	0	0	0	0	0	0	0	0	0	0	0	0	0	0	0	0	0	0
Pancreatitis	Gastr	0	0	0	2	0	0	0	0	3	0	0	0	0	0	0	0	0	0	0	0	0	0	0	0	0
Abdominal pain	Gastr	0	0	0	0	0	0	0	0	3	0	0	0	0	0	0	0	0	0	0	0	1	1	0	0	0
Intestinal perforation	Gastr	3	0	0	0	0	0	2	0	0	0	0	0	0	0	0	0	0	0	0	0	0	0	0	0	0
Death	Genrl	16	3	24	5	13	0	7	2	6	0	1	3	10	0	0	1	0	6	1	3	1	0	0	0	5
Perforation	Genrl	5	0	0	0	0	15	2	7	0	3	0	2	0	0	9	0	4	0	0	0	0	0	0	0	0
Ulcer	Genrl	1	0	0	0	0	15	0	7	0	3	0	2	0	0	9	0	4	0	0	0	0	0	0	0	0
Pain	Genrl	1	2	1	0	3	0	2	1	3	0	0	0	0	0	0	1	0	1	0	1	1	2	0	0	0
Sudden death	Genrl	1	3	9	0	0	0	0	0	0	0	0	0	0	0	0	0	0	0	0	0	0	0	0	0	0
Drug interaction	Genrl	1	0	0	0	6	0	0	0	0	1	0	0	0	0	0	0	0	2	0	0	0	0	0	0	0
Fibrosis	Genrl	2	0	0	0	0	0	2	0	0	0	0	0	0	0	0	0	0	0	4	0	0	0	0	0	0
Asthenia	Genrl	1	0	1	0	0	0	0	1	3	0	2	0	0	0	0	0	0	0	0	0	0	0	0	0	0
Oedema	Genrl	3	0	0	0	0	0	0	0	3	0	0	0	0	0	0	0	0	0	1	0	2	0	0	0	0
Pyrexia	Genrl	2	0	1	1	0	0	0	0	0	0	0	0	0	0	0	0	0	0	0	0	0	1	0	0	0
Necrosis	Genrl	5	0	0	0	0	0	2	0	0	0	0	0	0	0	0	0	0	0	0	0	0	0	0	0	0
Discomfort	Genrl	0	2	0	0	0	0	0	0	0	0	0	2	0	0	0	0	0	0	0	0	0	0	0	0	0
Chest pain	Genrl	0	2	1	0	0	0	2	0	0	0	0	0	0	0	0	1	0	0	0	0	0	0	0	0	0
Hyperplasia	Genrl	0	0	0	0	0	0	0	0	0	2	0	0	0	0	0	3	0	0	0	0	0	0	0	0	0
Malaise	Genrl	0	0	0	0	0	0	0	0	4	0	0	0	0	0	0	0	0	0	0	0	1	0	0	0	0
Drug tolerance	Genrl	2	3	0	0	0	0	0	0	0	0	0	0	0	0	0	0	0	0	0	0	0	0	0	0	0
Hepatotoxicity	Hepat	10	0	0	5	1	0	4	0	3	0	0	0	0	0	0	0	0	0	0	0	0	1	0	0	0
Hepatic failure	Hepat	1	0	0	5	1	0	2	0	4	0	0	0	0	0	0	0	0	0	0	0	0	1	0	1	0
Hepatitis	Hepat	0	0	0	11	0	0	0	0	0	0	0	0	0	0	0	0	0	0	0	0	0	0	0	0	0
Liver disorder	Hepat	3	0	0	0	0	0	4	0	0	1	0	0	0	0	0	0	0	0	0	0	1	0	0	0	0
Liver injury	Hepat	0	0	0	0	1	0	2	0	4	0	0	0	0	0	0	0	0	0	0	0	0	0	0	1	0
Hepatomegaly	Hepat	0	0	0	9	0	0	0	0	0	0	0	0	0	0	0	0	0	0	0	0	0	0	0	0	0
Acute hepatic failure	Hepat	0	0	0	0	1	0	0	0	4	0	0	0	0	0	0	0	0	0	0	0	0	0	0	1	0
Chronic hepatitis	Hepat	0	0	0	5	0	0	0	0	0	0	0	0	0	0	0	0	0	0	0	0	0	0	0	0	0
Jaundice	Hepat	0	0	0	0	0	0	0	0	1	0	0	0	0	0	0	0	0	0	0	0	0	1	0	0	0
Immunosuppression	Immun	1	0	0	2	0	0	6	1	0	0	0	0	0	0	0	0	1	0	0	0	0	0	0	0	0
Hypersensitivity	Immun	5	0	0	3	0	0	0	0	0	0	0	0	0	0	0	0	0	0	0	0	0	0	1	0	0
Immunodeficiency	Immun	0	0	0	6	0	0	0	1	0	0	0	0	0	0	0	0	0	0	0	0	0	0	0	0	0
Anaphylactic reaction	Immun	5	0	0	0	0	0	0	0	0	0	0	0	0	0	0	1	0	0	0	0	0	0	0	0	0
Infection	Infec	10	0	1	9	0	0	5	2	1	0	1	0	0	0	0	0	1	0	0	0	0	0	0	0	0
Hepatitis A	Infec	0	0	0	11	0	0	0	0	0	0	0	0	0	0	0	0	0	0	0	0	0	0	0	0	0
Hepatitis D	Infec	0	0	0	11	0	0	0	0	0	0	0	0	0	0	0	0	0	0	0	0	0	0	0	0	0
Pneumonia	Infec	2	0	9	0	0	0	2	0	0	0	1	0	0	0	0	0	0	0	0	0	0	0	0	0	0
Hepatitis B	Infec	0	0	0	9	0	0	0	0	0	0	0	0	0	0	0	0	0	0	0	0	0	0	0	0	0
HIV infection	Infec	0	0	0	6	0	0	0	0	0	0	0	0	0	0	0	0	0	0	0	0	0	0	0	0	0
Chronic hepatitis B	Infec	0	0	0	5	0	0	0	0	0	0	0	0	0	0	0	0	0	0	0	0	0	0	0	0	0
Pneumocystis jirovecii pneumonia	Infec	2	0	0	0	0	0	3	0	0	0	0	0	0	0	0	0	0	0	0	0	0	0	0	0	0
Lactic acidosis	Metab	0	0	0	9	0	0	0	0	0	0	0	0	0	0	0	0	0	0	0	0	1	0	0	0	0
Acidosis	Metab	0	0	0	9	0	0	0	0	0	0	0	0	0	0	0	0	0	0	0	0	1	0	0	0	0
Decreased appetite	Metab	0	0	0	0	0	0	0	0	4	0	0	0	0	0	0	0	0	0	0	0	0	0	0	3	0
Diabetes mellitus	Metab	0	0	0	0	0	0	0	0	0	0	0	0	0	1	0	0	0	0	4	0	1	0	0	0	0
Obesity	Metab	0	1	0	0	0	0	0	0	0	0	0	0	0	0	0	0	0	0	0	0	0	0	0	4	0
Rheumatoid arthritis	Musc	3	0	0	0	0	1	3	0	0	0	0	0	0	0	0	0	0	0	0	0	0	0	0	0	0
Arthritis	Musc	2	0	0	0	0	1	3	0	0	0	0	0	0	0	0	0	0	0	0	0	0	0	0	0	0
Muscular weakness	Musc	0	0	0	0	0	0	0	1	0	0	3	0	0	0	0	0	0	0	0	0	0	0	0	0	0
Neoplasm malignant	Neopl	14	0	0	1	0	0	1	1	0	3	0	0	0	0	0	4	0	0	0	0	2	0	0	0	0
Lymphoma	Neopl	3	0	0	0	0	0	10	1	0	0	0	0	0	0	0	0	3	0	0	0	0	0	0	0	0
Breast cancer	Neopl	1	0	0	0	0	0	0	0	0	3	0	0	0	0	0	3	0	0	0	0	0	0	0	0	0
Endometrial cancer	Neopl	0	0	0	0	0	0	0	0	0	3	0	0	0	0	0	4	0	0	0	0	0	0	0	0	0
Leukaemia	Neopl	5	0	0	0	0	0	0	0	0	0	0	0	0	0	0	0	0	0	0	0	0	0	0	0	0
Cerebrovascular accident	Nerv	2	2	0	0	0	15	2	7	0	6	0	3	0	2	9	5	4	0	0	0	0	0	0	0	0
Coma	Nerv	1	0	7	0	10	0	0	0	1	0	0	0	0	0	0	0	0	3	2	3	0	0	0	0	0
Sedation	Nerv	0	0	7	0	11	0	0	0	1	0	0	0	0	0	0	0	0	2	0	3	0	0	0	0	0
Dementia	Nerv	0	0	18	0	0	0	0	0	0	3	0	0	0	0	0	3	0	0	0	0	0	0	0	0	0
Seizure	Nerv	1	0	1	1	0	0	0	1	4	0	1	0	0	0	0	0	0	1	2	1	0	0	0	0	0
Paralysis	Nerv	1	0	0	0	0	0	0	0	0	0	0	0	0	5	0	0	0	0	1	0	0	0	0	0	0
Lethargy	Nerv	0	0	1	0	0	0	0	0	3	0	0	0	0	0	0	0	0	0	0	0	0	1	0	0	0
Nervous system disorder	Nerv	0	0	0	0	1	0	0	0	0	0	0	0	0	5	0	0	0	0	0	0	0	0	0	0	0
Syncope	Nerv	0	2	1	0	0	0	0	0	0	1	0	0	0	0	0	1	0	0	0	0	0	0	0	0	0
Epilepsy	Nerv	0	0	0	0	0	0	0	0	5	0	0	0	0	0	0	0	0	0	0	0	0	0	0	0	0
Neurotoxicity	Nerv	3	0	0	0	0	0	0	1	0	0	1	0	0	0	0	0	0	0	0	0	0	0	0	0	0
Neuropathy peripheral	Nerv	1	0	0	0	0	0	0	1	0	0	2	0	0	0	0	0	0	0	0	0	0	0	0	0	0
Anaesthesia	Nerv	0	0	0	0	0	0	0	0	0	0	0	0	0	5	0	0	0	0	0	0	0	0	0	0	0
Myasthenia gravis	Nerv	0	0	0	0	0	0	0	1	0	0	3	0	0	0	0	0	0	0	0	0	0	0	0	0	0
Pregnancy	Preg	7	0	0	3	11	1	9	1	3	2	2	0	10	0	0	1	0	1	0	2	0	4	0	1	0
Foetal death	Preg	5	0	0	0	0	0	7	0	0	0	0	0	0	0	0	0	0	0	0	0	0	0	0	0	0
Delivery	Preg	0	0	0	0	1	1	0	0	0	1	0	0	0	0	0	0	0	0	0	1	0	0	0	0	0
Depression	Psych	0	24	7	0	13	0	0	0	3	0	0	0	0	0	0	0	0	3	0	6	0	0	0	0	0
Substance abuse	Psych	0	7	3	0	13	0	0	0	0	0	0	0	0	0	0	0	0	6	0	4	0	0	0	0	0
Dependence	Psych	0	7	2	0	13	0	0	0	0	0	0	0	0	0	0	0	0	5	0	3	0	0	0	0	0
Nervousness	Psych	2	0	0	0	10	0	0	1	0	0	2	0	0	0	0	0	0	3	0	3	0	0	0	0	0
Psychotic disorder	Psych	0	4	18	0	1	0	0	0	0	0	0	0	0	0	0	0	0	0	0	0	0	0	0	0	0
Completed suicide	Psych	0	21	0	0	0	0	0	0	0	0	0	0	0	0	0	0	0	0	0	2	0	0	0	0	0
Withdrawal syndrome	Psych	0	0	0	0	11	0	0	0	0	0	0	0	0	0	0	0	0	1	0	2	0	0	0	0	0
Social avoidant behaviour	Psych	0	0	0	0	0	0	0	0	2	0	0	0	0	0	0	0	0	0	0	0	0	0	1	0	0
Renal impairment	Renal	1	0	0	2	0	0	1	1	0	0	2	0	0	0	0	0	0	0	0	0	1	0	0	0	0
Nephropathy toxic	Renal	3	0	0	2	0	0	1	1	0	0	2	0	0	0	0	0	0	0	0	0	0	0	0	0	0
Acute kidney injury	Renal	0	0	0	1	0	0	0	0	0	0	0	0	0	0	0	0	0	0	5	0	0	0	0	0	0
Renal failure	Renal	1	0	0	1	0	0	0	0	0	0	0	0	0	0	0	0	0	0	1	0	0	0	0	0	0
Endometrial hyperplasia	Repro	0	0	0	0	0	0	0	0	0	2	0	0	0	0	0	3	0	0	0	0	0	0	0	0	0
Genital haemorrhage	Repro	0	0	0	0	0	0	0	0	0	2	0	0	0	0	0	3	0	0	0	0	0	0	0	0	0
Respiratory depression	Resp	0	0	6	0	13	0	0	0	1	0	0	0	0	0	0	0	0	3	0	4	0	0	0	0	0
Dyspnoea	Resp	4	2	1	0	0	0	2	0	0	0	0	0	0	0	0	1	0	0	0	0	4	0	0	0	0
Pulmonary embolism	Resp	0	0	0	0	0	0	3	0	1	2	0	0	0	0	0	3	0	0	0	0	0	0	0	0	0
Cough	Resp	2	0	0	0	0	0	2	0	0	0	0	0	0	0	0	1	0	0	0	0	0	0	0	0	0
Asthma	Resp	0	0	1	0	0	0	0	0	0	0	0	0	0	0	0	0	0	0	0	0	0	0	0	0	5
Bronchospasm	Resp	4	0	1	0	0	0	0	0	0	0	0	0	0	0	0	0	0	0	0	0	0	0	0	0	0
Rash	Skin	3	0	0	2	0	1	0	0	1	0	0	0	0	0	0	0	0	0	0	0	0	0	0	0	0
Toxic epidermal necrolysis	Skin	0	0	1	1	0	0	0	0	2	0	0	1	0	0	0	0	0	0	0	0	0	0	0	0	0
Psoriasis	Skin	2	0	0	0	0	0	2	0	0	0	0	0	0	0	0	0	0	0	0	0	0	0	0	0	0
Haemorrhage	Vasc	7	0	0	1	0	15	0	7	1	6	0	2	0	6	9	4	4	0	1	0	0	0	0	0	0
Infarction	Vasc	2	0	0	0	0	15	2	7	0	6	0	5	0	0	9	3	4	0	0	0	0	0	4	0	0
Hypotension	Vasc	5	0	1	0	2	0	0	1	1	1	0	1	0	1	0	0	0	0	0	0	1	1	0	0	0
Thrombosis	Vasc	1	0	0	0	0	0	5	1	0	3	0	0	0	0	0	5	0	0	0	0	0	0	0	0	0
Deep vein thrombosis	Vasc	0	0	0	0	0	0	3	0	0	3	0	0	0	0	0	5	0	0	0	0	0	0	0	0	0
Embolism	Vasc	1	0	0	0	0	0	3	0	0	2	0	0	0	0	0	3	0	0	0	0	0	0	0	0	0
Hypertension	Vasc	0	0	0	0	0	0	0	0	0	0	0	1	0	0	0	0	0	0	4	0	0	0	4	0	0
Haematoma	Vasc	0	0	0	0	0	0	0	0	0	0	0	0	0	5	0	0	0	0	0	0	0	0	0	0	0
	Total	50	33	27	21	18	17	15	15	11	11	11	10	10	10	9	9	7	7	7	6	6	5	5	5	5
